# Supplementary material for: STAT3-induced long noncoding RNAs in multiple myeloma cells display different properties in cancer
Source: PubMed Central journal article supplement (PMC5554185; doi:10.1038/s41598-017-08348-5), 2017-08-11
Supplement: 41598_2017_8348_MOESM1_ESM.pdf [file 41598_2017_8348_MOESM1_ESM.pdf]

1 **STAT3-induced long noncoding RNAs in multiple myeloma cells**  
2 **display different properties in cancer**  
3

4 **Supplementary information**

5  
6 Stefanie Binder<sup>1,2,7,¶\*</sup>, Nadine Hösler<sup>1,2,7,¶</sup>, Diana Riedel<sup>1,2</sup>, Ivonne Zipfel<sup>1,2</sup>, Tilo Buschmann<sup>2,3</sup>, Christoph Kämpf<sup>2,4,6,7</sup>,  
7 Kristin Reiche<sup>2,3,4</sup>, Renate Burger<sup>8</sup>, Martin Gramatzki<sup>8</sup>, Jörg Hackermüller<sup>2,4,5</sup>, Peter F. Stadler<sup>2,6,7,9-14</sup> and Friedemann  
8 Horn<sup>1-3,7</sup>

9 **Supplemental Table 1: (q) PCR primers**

10 **Supplemental Table 1: Listing of used (q) PCR primers complementary to the Methods section of the manuscript.**

11 The following PCR primers were designed using Primer3 software, blasted against the human genome hg19 and

12 provided by Eurofins Scientific, Luxembourg, Luxembourg.

| Primer                                             | Sequence                                                       | Comment                             | Product size |
|----------------------------------------------------|----------------------------------------------------------------|-------------------------------------|--------------|
| STAiR1.1_for<br>STAiR1.1_rev                       | 5'-CTCAGTTTGGCATCCGTTTT-3'<br>5'-ATTGACTTCCCAGGCCTTTT-3'       | Primary transcript, macroRNA        | 264bp        |
| STAiR1.2_for<br>STAiR1.2_rev                       | 5'-GCTGTGATGGACAGAAGCAA-3'<br>5'-TGAACACAGCAAGCACATGA-3'       | Primary transcript, macroRNA        | 104bp        |
| STAiR2.1_for<br>STAiR2.1_rev                       | 5'-TCGGTATGTGGGTTTGGTTT-3'<br>5'-CTGGCTTCTCAGCTGGACTT-3'       | Primary transcript, macroRNA        | 253bp        |
| STAiR2_5'exon_for                                  | 5'-ATTTCCGTTCCAAGTCCCA-3'                                      | For detection of STAiR2-DCC hybrid  |              |
| DCC_for<br>DCC_rev                                 | 5'-CAGCGCGCATCTTCAAGTAA-3'<br>5'-GACATTTCTCCCGCATTG-3'         | Spliced transcript, intron-spanning |              |
| STAiR6.1_for<br>STAiR6.1_rev                       | 5'-ATCTCATCGGGTCAGTGGAC-3'<br>5'-CTAATCCAGCCTGCTCCTTG-3'       | Primary transcript, macroRNA        | 271bp        |
| STAiR6.2_for<br>STAiR6.2_rev                       | 5'-GGCTAGGCTGAGGAAGGTCT-3'<br>5'-CTGCAAGTGGCATTACGAGA-3'       | Primary transcript, macroRNA        | 280bp        |
| STAiR15.1_for<br>STAiR15.1_rev                     | 5'-TCTGATGACCCTCTGGGTTC-3'<br>5'-GTGCTTTAAACGGGTGCATT-3'       | Primary transcript, macroRNA        | 252bp        |
| STAiR15.2_for<br>STAiR15.2_rev                     | 5'-GCTGCCTACAGAAAAGAAAGCTG-3'<br>5'-CAGTGTTCATGGTGTGATTAAC-3'  | Primary transcript, macroRNA        | 625bp        |
| MIAT_for = sSTAiR15_for<br>MIAT_rev = sSTAiR15_rev | 5'-GGCTCCTGGTCCTTCTTCT-3'<br>5'-TGACCGCTAAGTCACTGTGG-3'        | Spliced transcript, intron-spanning |              |
| STAiR18.1_for<br>STAiR18.1_rev                     | 5'-TGGCTGAGTTGTGGACAGAG-3'<br>5'-CCCCAGTACTGCAGGTA-3'          | Primary transcript, macroRNA        | 330bp        |
| STAiR18.2_for<br>STAiR18.2_rev                     | 5'-TGAGAATACATATGTGTGCAAGGA-3'<br>5'-GGAACACTCTGAAAAACACCAA-3' | Primary transcript, macroRNA        | 106bp        |
| sSTAiR18_for<br>sSTAiR18_rev                       | 5'-CGTGCCTGTCTTCAGATCTTC-3'<br>5'-GGGAATCTTTCAGCTGCATT-3'      | Spliced transcript, intron-spanning |              |
| MALAT1_for<br>MALAT1_rev                           | 5'-CTACTGGGCTGACATTA-3'<br>5'-ACAAAAGCTACCATCAGAAG-3'          | Primary and spliced transcript      |              |
| GAPDH_for<br>GAPDH_rev                             | 5'-GTCAGTGGTGGACCTGACCT-3'<br>5'-AGGGGAGATTCAAGTGTGGTG-3'      | Spliced transcript, intron-spanning |              |
| HOTAIR_for<br>HOTAIR_rev                           | 5'-GGGAGTTCCACAGCAACA-3'<br>5'-TTAGGGACCTGAGGGTCTAAGTC-3'      | Primary transcript                  |              |
| U6_for<br>U6_rev                                   | 5'-CTCGCTTCGGCAGCACA-3'<br>5'-AACGCTTCACGAATTTGCGT-3'          | Primary transcript                  |              |
| STAT3_for<br>STAT3_rev                             | 5'-GAGGGAACAAGCCCAAC-3'<br>5'-CTTGCAGGAAGCGGCTATAC-3'          | Spliced transcript, intron-spanning |              |
| SGK1_for<br>SGK1_rev                               | 5'-TTCTATGCTGCTGAAATAGCCA-3'<br>5'-CCAGTCCACAGTCTGTCTATAA-3'   | Spliced transcript, intron-spanning |              |
| Pri-miR21_for<br>Pri-miR21_rev                     | 5'-CATTGTGGGTTTTGAAAAGGTTA-3'<br>5'-CCACGACTAGAGGCTGACTTAGA-3' | Primary transcript                  |              |
| Mature-miR21_RT primer                             | 5'-<br>GTCGTATCCAGTGCAGGGTCCGAGGTATTC<br>GCACTG-3'             | Stemloop RT primer                  |              |

Mature-miR21\_for  
Mature-miR21\_rev

5'-GCCCCTAGCTTATCAGACTGATG-3'  
5'-GTGCAGGGTCCGAGGT-3'

Mature miR21

---

## 14 Supplemental Table 2: ChIRP oligonucleotides

15 Supplemental Table 2: Listing of used ChIRP oligonucleotides complementary to the Methods section of the  
16 manuscript. The following 3'-biotinylated DNA oligonucleotides (= BITEG; with a TEG spacer between the oligo and  
17 biotin, non-overlapping, 20-25mers, blasted against the human genome hg19) were designed using  
18 [www.singlemoleculfish.com](http://www.singlemoleculfish.com) and provided by Eurofins Scientific, Luxembourg, Luxembourg.

| Oligo     | Sequence                               |
|-----------|----------------------------------------|
| lacZ1     | 5'-CCAGCTTTCATCAACATTAATGTG-3'-BITEG   |
| lacZ2     | 5'-ATAAAGAACTGTTACCCGTAGGTA-3'-BITEG   |
| lacZ3     | 5'-CGTTAAAGTTGTTCTGCTTCATCAG-3'-BITEG  |
| lacZ4     | 5'-GCCGTTTTTCATCATATTTAATCAGC-3'-BITEG |
| lacZ5     | 5'-AGTTCAATCAACTGTTTACCTTGTC-3'-BITEG  |
| lacZ6     | 5'-TGATAAATAAGGTTTTCCCTGATG-3'-BITEG   |
| STAiR1.1  | 5'-AACTGGAGTCTCAGCCAAAG-3'-BITEG       |
| STAiR1.2  | 5'-TCTCTAAGTGGGTTTCAGT-3'-BITEG        |
| STAiR1.3  | 5'-AGAAGGCTTTTCAGAGATCT-3'-BITEG       |
| STAiR1.4  | 5'-AGTGCCAAGAAGTAAGGGTA-3'-BITEG       |
| STAiR1.5  | 5'-GTCCACATTCAAACTTTACA-3'-BITEG       |
| STAiR1.6  | 5'-CAGTAATCCGTTTAACAGCA-3'-BITEG       |
| STAiR1.7  | 5'-ATCCCAACTCACTCCATTTTC-3'-BITEG      |
| STAiR1.8  | 5'-AGACTTACTGGTCTTCTGG-3'-BITEG        |
| STAiR1.9  | 5'-GTCAGGAAGGGAAATCAGTT-3'-BITEG       |
| STAiR1.10 | 5'-GCATCAACTGTGCTCAGAAC-3'-BITEG       |
| STAiR1.11 | 5'-AGCCGATCCAAGGTAATATT-3'-BITEG       |
| STAiR1.12 | 5'-TCCCTGTGCATGTTAAAGG-3'-BITEG        |
| STAiR2.1  | 5'-CTTTCTCAAAGTGAGTTGCC-3'-BITEG       |
| STAiR2.2  | 5'-TTGTGACCATAATTGCTGGG-3'-BITEG       |
| STAiR2.3  | 5'-CTGTGCTCACTCCAAGTATA-3'-BITEG       |
| STAiR2.4  | 5'-GTTGTGGAATAGGTTGAGCT-3'-BITEG       |
| STAiR2.5  | 5'-AGTTTGCCTGGAATCATACA-3'-BITEG       |
| STAiR2.6  | 5'-GGACTAAATCACAGGGCGAC-3'-BITEG       |
| STAiR2.7  | 5'-CCCATCCGTTATGAATCAAC-3'-BITEG       |
| STAiR2.8  | 5'-CTAGGGAAGATTTACCTGT-3'-BITEG        |
| STAiR2.9  | 5'-GGTAGCACTCTAATGGCAAT-3'-BITEG       |
| STAiR2.10 | 5'-GTCACAGAGTCAATACCACT-3'-BITEG       |
| STAiR2.11 | 5'-ATAGCAATTGGTGCTACTGC-3'-BITEG       |

STAIR2.12 5'- CAGCATCAATTTTGGTGAC -3'-BITEG  
 STAIR6.1 5'- CTGACACTAAGGGAGGCATA -3'-BITEG  
 STAIR6.2 5'- AGTTGGGAAACCTCTTCGTC -3'-BITEG  
 STAIR6.3 5'- CATCTCCGGCATTATGACAC -3'-BITEG  
 STAIR6.4 5'- CTTGGGTACGAGGAGGTAA -3'-BITEG  
 STAIR6.5 5'- GAGAGTGACACTGACCAAGT -3'-BITEG  
 STAIR6.6 5'- GGAATTACTCTGTGCGATT -3'-BITEG  
 STAIR6.7 5'- TAACGTTACGGCCAGTTAA -3'-BITEG  
 STAIR6.8 5'- GCGAACTTTGAGGAAGCTC -3'-BITEG  
 STAIR6.9 5'- AAATTCTGTCCAAGGGAGT -3'-BITEG  
 STAIR6.10 5'- TCTTCTGGTGTGGAGAATG -3'-BITEG  
 STAIR6.11 5'- TGTACCCGAGAGAACTCAC -3'-BITEG  
 STAIR6.12 5'- CATTTGTAACCGAGCAGACG -3'-BITEG  
 STAIR15.1 5'- CTAGTGCAGAGGGCTCTTG -3'-BITEG  
 STAIR15.2 5'- AACCATGGGTGGACAGAT -3'-BITEG  
 STAIR15.3 5'- CTGGCTTGATCCACAGTGAC -3'-BITEG  
 STAIR15.4 5'- ATGCACCAGAGAAATTCGG -3'-BITEG  
 STAIR15.5 5'- CTGACATGAAGATCTGAGCA -3'-BITEG  
 STAIR15.6 5'- GAATCAAGTTCACATGGGGC -3'-BITEG  
 STAIR15.7 5'- CTGGAATTGCAGATTGTGGG -3'-BITEG  
 STAIR15.8 5'- CATCTCCACAGTTCTAAAC -3'-BITEG  
 STAIR15.9 5'- CATCTGCTTCCAAAAGGAG -3'-BITEG  
 STAIR15.10 5'- AGGAGTGAAGATATGCCAA -3'-BITEG  
 STAIR15.11 5'- AAATCCACTAACTCCCTTC -3'-BITEG  
 STAIR15.12 5'- AATTTACTACCACACATTCG -3'-BITEG  
 STAIR18.1 5'- TTCTATTGGAACGAGATGACTCAT-3'-BITEG  
 STAIR18.2 5'- TCCATTCCAATGATGTACACACGA-3'-BITEG  
 STAIR18.3 5'- TCAGGCACCGCTTGTCTGGAATGTC-3'-BITEG  
 STAIR18.4 5'- GAACTGTGCTGTGAAGATCTGAAGA-3'-BITEG  
 STAIR18.5 5'- CCTGTTTCATCTCCAGTTATTCAG-3'-BITEG  
 STAIR18.6 5'- ATATTCGATCAAGTGTGCATAGAG-3'-BITEG  
 STAIR18.7 5'- TCAGCTGCATTCCGGCTGTGATCGG-3'-BITEG  
 STAIR18.8 5'- GGTGGAACCCAGGCCCCAGGAATC-3'-BITEG  
 STAIR18.9 5'- CAAATGCAGAGGCCTCAGAGTCCAC-3'-BITEG  
 STAIR18.10 5'- CATGACCAAATATCACAGGCAGAC-3'-BITEG  
 STAIR18.11 5'- CAGACAAATGGGAAACCGACCAGAC-3'-BITEG  
 STAIR18.12 5'- AATGAAGGACAAGGGATTAAGACAC-3'-BITEG

20 **Supplemental Table 3: Overview of used patient/donor material**

21 **Supplemental Table 3: Collection of RNA samples used to evaluate STAIR expression in tumor entities.** The table  
 22 contains clinical information about the used tumorous and healthy tissue samples as it was stated by the  
 23 manufacturers.

| Tissue   | Patient matched | Gender | Age | Clinical diagnosis                                                                 | Number donors | Order number   | Manufacturer |
|----------|-----------------|--------|-----|------------------------------------------------------------------------------------|---------------|----------------|--------------|
| Breast   | Yes             | Female | 53  | Invasive Ductal Carcinoma, Poorly Differentiated, Metastasize to Armpit Lymph Node | 1             | R8235086-PP-10 | Biochain     |
| Colon    | Yes             | Male   | 68  | Adenocarcinoma, Moderately Differentiated, Colon Tumor Metastasize to Lymph Node   | 1             | R8235090-PM-10 | Biochain     |
| Kidney   | Yes             | -      | -   | -                                                                                  | -             | R8235142-PM-10 | Biochain     |
| Liver    | Yes             | Male   | 59  | Liver cancer, Liver cancer Metastasize to Lymph Node                               | 1             | R8235149-PM-10 | Biochain     |
| Lung     | Yes             | -      | -   | -                                                                                  | 1             | R8235152-PM-10 | Biochain     |
| Bladder  | No              | Male   | 44  | Normal                                                                             | 1             | R1234010-50    | Amsbio       |
| Bladder  | No              | -      | -   | Tumor                                                                              | 1             | R1235010-10    | Amsbio       |
| Prostate | No              | Male   | 24  | Normal                                                                             | 1             | R1234201-50    | Amsbio       |
| Prostate | No              | Male   | 48  | Adenocarcinoma of prostate                                                         | 1             | CR560070       | Origene      |

24 \*for kidney, lung and bladder no further information was given by the manufacturer

25 **Supplemental Figure 1: Chromatin-association of STAiRs**

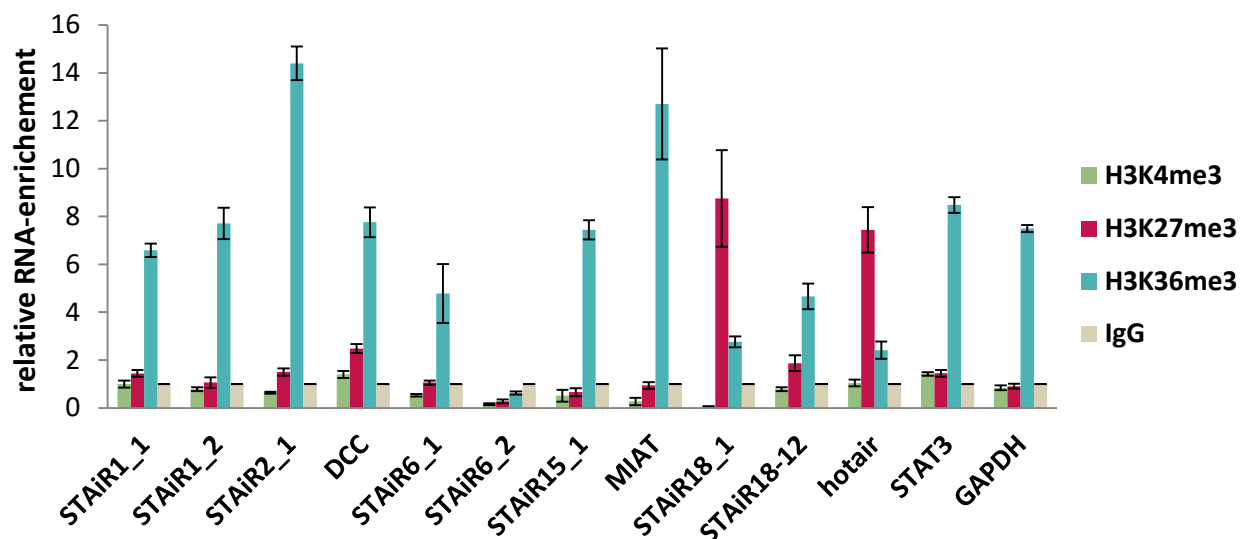

26

27 **Supplemental Figure 1: Chromatin association of STAiRs.** RNA immunoprecipitation was performed with

28 permanently IL-6-treated INA-6 cells using antibodies targeting H3K36me3, H3K4me3, and H3K27me3 as well as

29 IgG as a negative control. RNA was prepared, DNase-digested, and reverse transcribed. RNA enrichment was

30 analyzed by qPCR using gene-specific primers. Samples were normalized to the IgG control.

31 **Supplemental Figure 2: Raw data image files of agarose gels depicted in Figure 3**

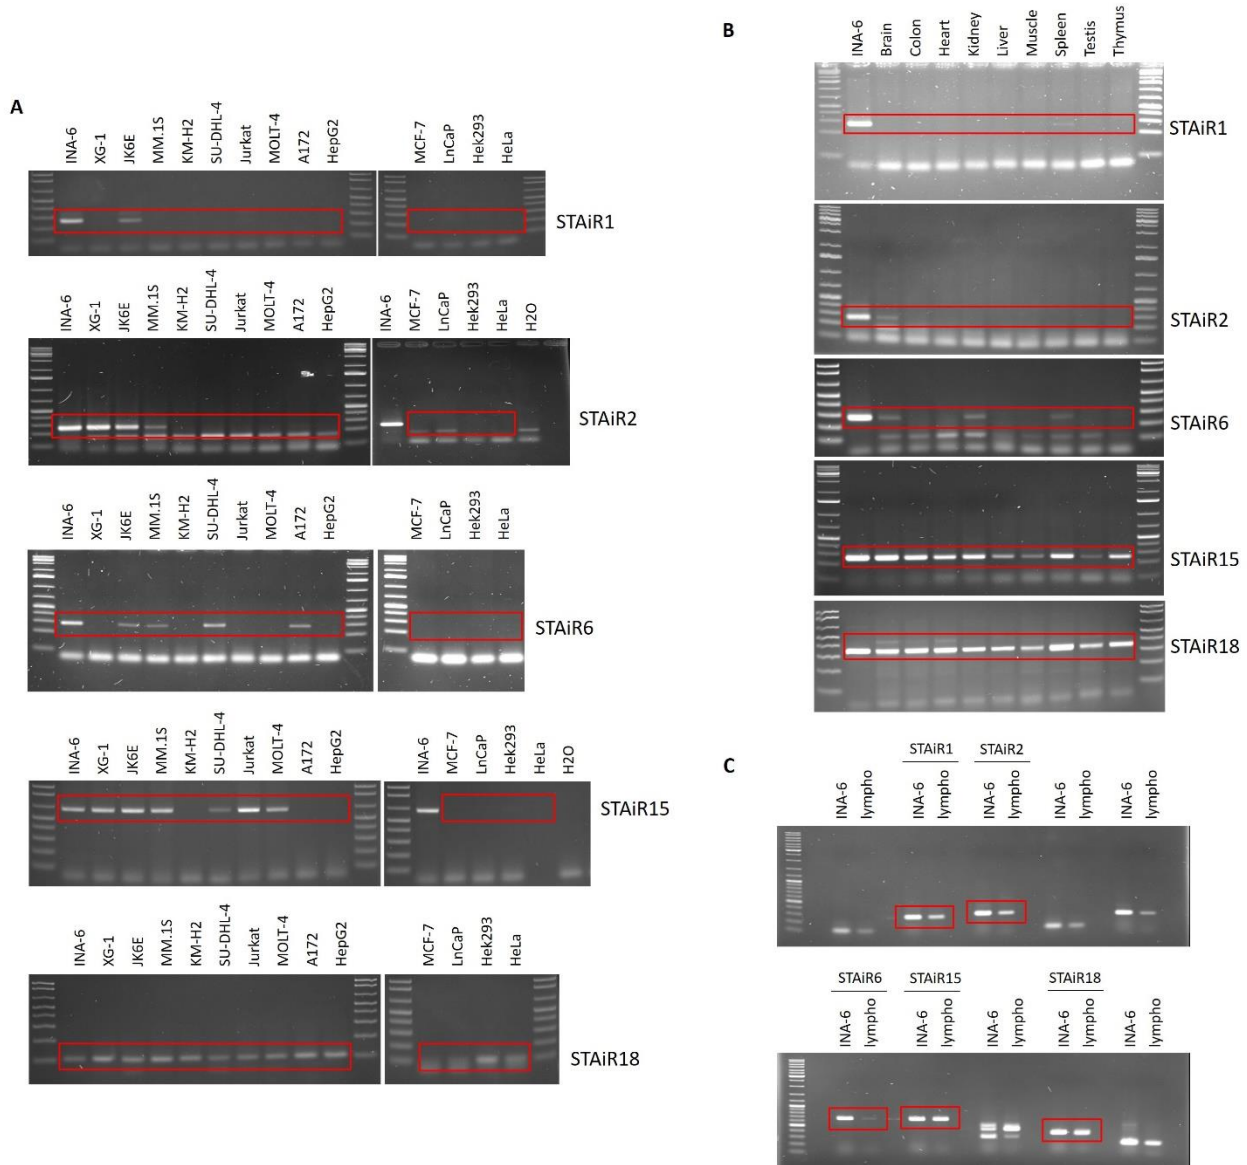

32

33 **Supplemental Figure 2: Raw data image files depicted in Figure 3 displaying the expression of STAIRs in (A) cell**

34 **lines and (B) tissues.** RNA was isolated from various (A) cell lines and primary lymphocytes (C). DNase-digested

35 RNAs as well as Ambion's FirstChoice® Human Tissue Total RNAs (B) were reverse-transcribed and subjected to

36 standard PCR using primer pairs for primary STAIRs, resulting in product sizes of 264bp for STAIR1, 253bp for

37 STAIR2, 271bp for STAIR6, 252bp and 625bp for STAIR15.1 and STAIR15.2, respectively, as well as 330bp and 106bp

38 for STAIR18.1 and STAIR18.2, respectively. No adjustments of brightness and contrast were made for this figure.

39 Cropped bands marked by a red box were inverted and displayed in Figure 3 of this manuscript.



40 **Supplemental Figure 3: Analysis of STAIR binding motifs by MEME**

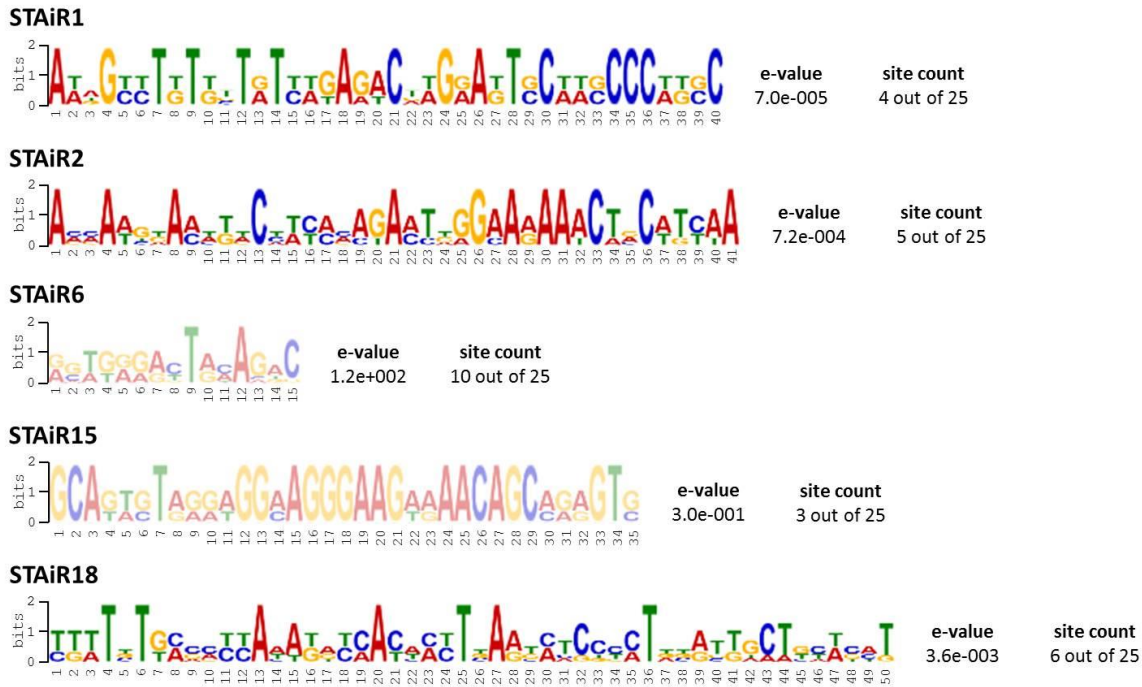

41

42 **Supplemental Figure 3: Analysis of potential STAIR binding motifs by MEME.** Following STAIR-ChIRP-seq, read

43 sequences of the top 25 RNAs specifically interacting with each STAIR compared to the lacZ negative control were

44 analyzed by MEME (Multiple Em for Motif Elicitation) online tool. Compared read sequence lengths varied from 50-

45 200nt. Computed motifs are shown on the left. On the right, e-values for each motif and the number of RNA

46 sequences (out of 25) found to harbor this motif are depicted. Nonsignificant motifs are exposed in transparent.

47 **Supplemental Figure 4: Detection of human DCC protein product in dependence of IL-6**  
48 **treatment**

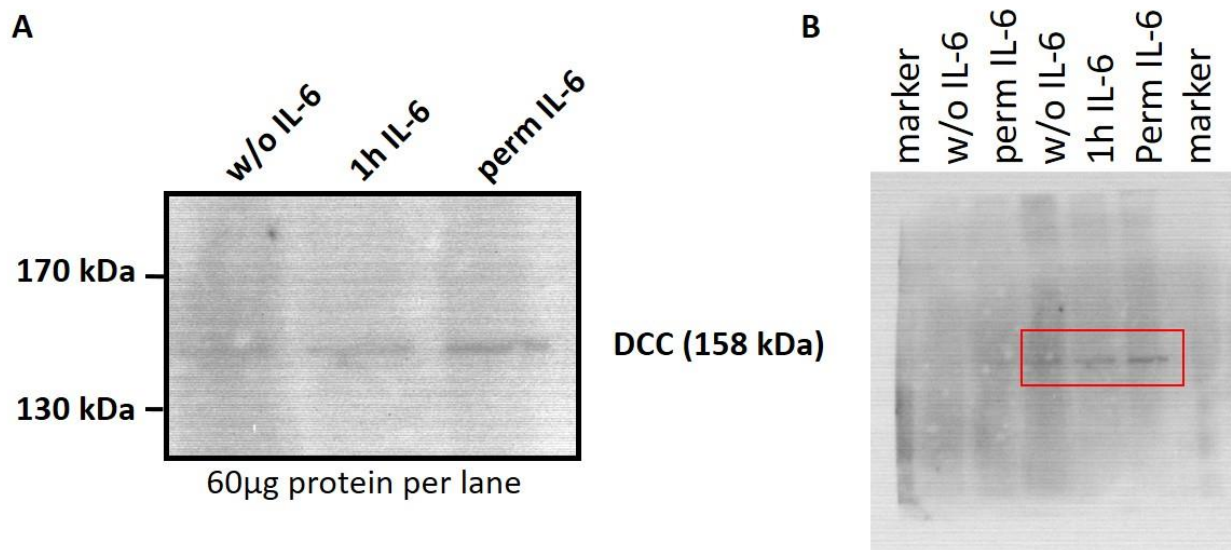

49

50 **Supplemental Figure 4: Detection of human DCC protein product in dependence of IL-6 treatment (A) and the**  
51 **according raw data image (B).** INA-6 cells were either permanently grown in the presence of IL-6 (perm IL-6) or  
52 withdrawn from IL-6 for 12 h (w/o IL-6), and subsequently restimulated with IL-6 for 1 h (1h IL-6). Proteins were  
53 isolated using RIPA buffer and 60µg protein lysate were separated by SDS-PAGE (8% PAA gel). Proteins were  
54 blotted onto a PVDF membrane and visualized using a primary antibody targeting human DCC (abcam ab118918,  
55 rabbit) and a secondary swine-anti-rabbit-HRP antibody (DAKO P0217). Detection occurred upon SuperSignal®  
56 maximum sensitivity substrate (Thermo #34095) addition with a CCD camera.
